# Supplementary material for: A comprehensive collection of experimentally validated primers for Polymerase Chain Reaction quantitation of murine transcript abundance
Source: Springer Nature journal article supplement (doi:10.1186/1471-2164-9-633), 2008-12-01
Supplement: Additional file 9 [file 1471-2164-9-633-s9.pdf]

| <b>Well</b> | <b>Ct: technical replicate 1</b> | <b>Ct: technical replicate 2</b> | <b>Ct: technical replicate 3</b> | <b>Ct: technical replicate 4</b> | <b>Ct: technical replicate 5</b> | <b>Standard deviation</b> | <b>Average Ct</b> | <b>Coefficient of variation</b> |
|-------------|----------------------------------|----------------------------------|----------------------------------|----------------------------------|----------------------------------|---------------------------|-------------------|---------------------------------|
| A1          | 26.15                            | 26.06                            | 25.37                            | 26.44                            | 24.58                            | 0.75                      | 25.72             | 0.029                           |
| A2          | 22.2                             | 23.65                            | 22                               | 23.09                            | 23.17                            | 0.7                       | 22.82             | 0.03                            |
| A3          | 22.75                            | 22.61                            | 22.27                            | 22.47                            | 22.43                            | 0.18                      | 22.51             | 0.008                           |
| A4          | 22.11                            | 22.93                            | 20.92                            | 22.79                            | 23.74                            | 1.05                      | 22.5              | 0.047                           |
| A5          | 22.17                            | 22.61                            | 21.43                            | 22.38                            | 22.13                            | 0.44                      | 22.14             | 0.02                            |
| A6          | 21.89                            | 22.02                            | 21.11                            | 22.1                             | 22.62                            | 0.54                      | 21.95             | 0.025                           |
| A7          | 21.71                            | 22.24                            | 22.58                            | 21.99                            | 21.79                            | 0.35                      | 22.06             | 0.016                           |
| A8          | 21.67                            | 22.23                            | 20.29                            | 23.22                            | 22.14                            | 1.07                      | 21.91             | 0.049                           |
| A9          | 32.14                            | 30.37                            | 33.21                            | 32.89                            | 33.13                            | 1.18                      | 32.35             | 0.037                           |
| A10         | 22.18                            | 22.39                            | 21.87                            | 22.27                            | 22.32                            | 0.2                       | 22.21             | 0.009                           |
| A11         | 22.42                            | 23.06                            | 22.6                             | 23.24                            | 23.06                            | 0.35                      | 22.88             | 0.015                           |
| A12         | 22.35                            | 22.51                            | 22.69                            | 22.92                            | 23.4                             | 0.41                      | 22.77             | 0.018                           |
| B1          | 22.18                            | 23.07                            | 22.3                             | 22.67                            | 22.6                             | 0.35                      | 22.56             | 0.015                           |
| B2          | 22.9                             | 23.38                            | 22.67                            | 23.23                            | 23.17                            | 0.28                      | 23.07             | 0.012                           |
| B3          | 22.5                             | 22.92                            | 23.53                            | 23.2                             | 22.46                            | 0.46                      | 22.92             | 0.02                            |
| B4          | 22.37                            | 22.38                            | 21.75                            | 22.19                            | 22.18                            | 0.26                      | 22.17             | 0.011                           |
| B5          | 22.02                            | 22.47                            | 21.48                            | 22.03                            | 22.19                            | 0.36                      | 22.04             | 0.016                           |
| B6          | 21.79                            | 22.46                            | 21.37                            | 22.45                            | 22.04                            | 0.46                      | 22.02             | 0.021                           |
| B7          | 20.67                            | 21.01                            | 21.43                            | 22.12                            | 21.79                            | 0.58                      | 21.4              | 0.027                           |
| B8          | 22.02                            | 22.69                            | 22.25                            | 22.52                            | 22.47                            | 0.26                      | 22.39             | 0.012                           |
| B9          | 22.03                            | 22.41                            | 21.79                            | 22.24                            | 22.19                            | 0.23                      | 22.13             | 0.011                           |
| B10         | 22.1                             | 22.58                            | 21.29                            | 22.22                            | 22.32                            | 0.49                      | 22.1              | 0.022                           |
| B11         | 22.24                            | 23.07                            | 22.37                            | 22.17                            | 24.56                            | 1                         | 22.88             | 0.044                           |
| B12         | 22.44                            | 22.86                            | 22.35                            | 23.02                            | 22.47                            | 0.29                      | 22.63             | 0.013                           |
| C1          | 25.49                            | 26.04                            | 27.18                            | 26.25                            | 25.65                            | 0.66                      | 26.12             | 0.025                           |
| C2          | 23.18                            | 23.68                            | 23.3                             | 23.49                            | 23.87                            | 0.28                      | 23.5              | 0.012                           |
| C3          | 22.3                             | 22.86                            | 22.14                            | 22.25                            | 22.29                            | 0.28                      | 22.37             | 0.013                           |
| C4          | 22.26                            | 22.88                            | 22.26                            | Undetec.                         | 22.7                             | 0.31                      | 22.52             | 0.014                           |
| C5          | 22.18                            | 22.72                            | 22.19                            | 22.77                            | 22.57                            | 0.28                      | 22.49             | 0.013                           |
| C6          | 22.09                            | 22.48                            | 21.93                            | 21.96                            | 23.33                            | 0.59                      | 22.36             | 0.026                           |
| C7          | 22.59                            | 23.1                             | 22.48                            | 23.62                            | 22.12                            | 0.58                      | 22.78             | 0.026                           |
| C8          | 22.12                            | 22.62                            | 22.02                            | 21.66                            | 22.55                            | 0.4                       | 22.19             | 0.018                           |

|     |       |       |          |       |          |      |        |       |
|-----|-------|-------|----------|-------|----------|------|--------|-------|
| C9  | 22.05 | 22.28 | Undetec. | 22.69 | 21.63    | 0.44 | 22.162 | 0.02  |
| C10 | 23.39 | 23.78 | 23.05    | 23.49 | 24.42    | 0.51 | 23.63  | 0.022 |
| C11 | 22.43 | 23.07 | 22.27    | 23.16 | 22.53    | 0.4  | 22.69  | 0.018 |
| C12 | 22.88 | 23.21 | 22.93    | 23.14 | 23.04    | 0.14 | 23.04  | 0.006 |
| D1  | 23.6  | 24.2  | 24.33    | 24.22 | 24.2     | 0.29 | 24.11  | 0.012 |
| D2  | 23.17 | 23.58 | 23.18    | 23.61 | 23.52    | 0.22 | 23.41  | 0.009 |
| D3  | 23.22 | 23.76 | 23.2     | 23.9  | 23.87    | 0.35 | 23.59  | 0.015 |
| D4  | 23.04 | 23.52 | 23.13    | 23.28 | 23.16    | 0.18 | 23.23  | 0.008 |
| D5  | 21.31 | 21.94 | 21.27    | 22.03 | 21.66    | 0.35 | 21.64  | 0.016 |
| D6  | 22.28 | 23.01 | 22.35    | 23.01 | 23.57    | 0.53 | 22.84  | 0.023 |
| D7  | 23.65 | 24.06 | 23.76    | 24.66 | 23.42    | 0.48 | 23.91  | 0.02  |
| D8  | 22.25 | 23.03 | 22.52    | 22.79 | 23.07    | 0.35 | 22.73  | 0.015 |
| D9  | 23.4  | 24.01 | 24.26    | 24.18 | 24.07    | 0.34 | 23.98  | 0.014 |
| D10 | 22.46 | 22.72 | 22.24    | 23.39 | 22.92    | 0.44 | 22.75  | 0.019 |
| D11 | 22.05 | 22.96 | 22.33    | 22.32 | 22.15    | 0.35 | 22.36  | 0.016 |
| D12 | 21.23 | 21.26 | 20.34    | 21.02 | 21.09    | 0.37 | 20.99  | 0.018 |
| E1  | 22.46 | 23.12 | 22.93    | 22.83 | 23.33    | 0.33 | 22.93  | 0.014 |
| E2  | 22.69 | 22.84 | 22.64    | 23.37 | 22.6     | 0.32 | 22.83  | 0.014 |
| E3  | 23.25 | 23.57 | 23.62    | 23.7  | 24.03    | 0.28 | 23.63  | 0.012 |
| E4  | 22.78 | 23.39 | 25.05    | 23.09 | 23.01    | 0.91 | 23.46  | 0.039 |
| E5  | 22.94 | 23.67 | 23.96    | 34.13 | Undetec. | 5.32 | 26.17  | 0.203 |
| E6  | 22.92 | 23.31 | 22.64    | 22.27 | 23.17    | 0.42 | 22.86  | 0.018 |
| E7  | 22.25 | 23.08 | 22.48    | 23.79 | 23.1     | 0.6  | 22.94  | 0.026 |
| E8  | 21.49 | 22.2  | 21.8     | 21.73 | 22.13    | 0.29 | 21.87  | 0.013 |
| E9  | 22.22 | 23.05 | 22.32    | 23.6  | 23.15    | 0.58 | 22.87  | 0.026 |
| E10 | 22.29 | 22.92 | 22.28    | 22.2  | 22.45    | 0.29 | 22.43  | 0.013 |
| E11 | 22.13 | 22.88 | 22.37    | 22.91 | 23.41    | 0.5  | 22.74  | 0.022 |
| E12 | 23.14 | 23.68 | 23.88    | 24.32 | 23.25    | 0.48 | 23.65  | 0.02  |
| F1  | 23.66 | 23.71 | 23.16    | 24.14 | 23.38    | 0.37 | 23.61  | 0.016 |
| F2  | 23.24 | 23.6  | 23.38    | 23.45 | 23.74    | 0.19 | 23.48  | 0.008 |
| F3  | 22.36 | 22.89 | 22.16    | 23.02 | 22.92    | 0.38 | 22.67  | 0.017 |
| F4  | 22.36 | 22.72 | 22.92    | 22.91 | 23.21    | 0.31 | 22.82  | 0.014 |
| F5  | 22.46 | 22.64 | 22.02    | 22.66 | 22.01    | 0.32 | 22.36  | 0.014 |

|                           |       |       |          |       |       |      |       |       |
|---------------------------|-------|-------|----------|-------|-------|------|-------|-------|
| F6                        | 22.46 | 22.94 | 22.36    | 23.21 | 22.82 | 0.35 | 22.76 | 0.015 |
| F7                        | 22.22 | 22.87 | 22.25    | 22.16 | 22.56 | 0.3  | 22.41 | 0.013 |
| F8                        | 22.72 | 22.98 | 22.35    | 23.21 | 23.16 | 0.35 | 22.88 | 0.015 |
| F9                        | 22.07 | 22.61 | 22.13    | 23.23 | 22.36 | 0.47 | 22.48 | 0.021 |
| F10                       | 21.51 | 22    | 22.87    | 23.53 | 22.56 | 0.78 | 22.49 | 0.035 |
| F11                       | 21.51 | 22.06 | 21.12    | 21.34 | 22.01 | 0.41 | 21.61 | 0.019 |
| F12                       | 22.39 | 23.05 | 22.02    | 22.04 | 22.9  | 0.48 | 22.48 | 0.021 |
| G1                        | 21.52 | 22.17 | 22.19    | 23.04 | 22.52 | 0.55 | 22.29 | 0.025 |
| G2                        | 24.09 | 24.24 | 23.72    | 24.17 | 24.04 | 0.2  | 24.05 | 0.008 |
| G3                        | 22.38 | 23.11 | 22.67    | 23.02 | 22.9  | 0.29 | 22.82 | 0.013 |
| G4                        | 23.16 | 23.05 | 22.44    | 22.78 | 22.84 | 0.28 | 22.85 | 0.012 |
| G5                        | 22.95 | 23.2  | 22.81    | 22.82 | 23.63 | 0.34 | 23.08 | 0.015 |
| G6                        | 22.64 | 22.85 | 22.32    | 22.79 | 22.26 | 0.27 | 22.57 | 0.012 |
| G7                        | 23    | 23.21 | 22.14    | 22.54 | 22.35 | 0.45 | 22.65 | 0.02  |
| G8                        | 22.42 | 23.19 | 22.76    | 24.12 | 23.23 | 0.64 | 23.14 | 0.028 |
| G9                        | 22.21 | 23.46 | 23.17    | 23.96 | 23.41 | 0.64 | 23.24 | 0.028 |
| G10                       | 22.15 | 22.95 | 22.24    | 22.5  | 22.79 | 0.34 | 22.53 | 0.016 |
| G11                       | 23.3  | 23.82 | 23.28    | 23.43 | 25.18 | 0.8  | 23.8  | 0.034 |
| G12                       | 22.2  | 22.72 | 22.69    | 31.32 | 23.12 | 3.88 | 24.41 | 0.159 |
| H1                        | 24.32 | 24.81 | 27.19    | 24.62 | 25.23 | 1.14 | 25.23 | 0.045 |
| H2                        | 22.27 | 23.01 | 23.05    | 24.02 | 23.08 | 0.62 | 23.09 | 0.027 |
| H3                        | 22.32 | 22.77 | 22.43    | 22.29 | 23.2  | 0.38 | 22.6  | 0.017 |
| H4                        | 22.92 | 23.3  | 22.99    | 23.64 | 22.83 | 0.33 | 23.14 | 0.014 |
| H5                        | 22.17 | 22.73 | 22.58    | 22.92 | 22.9  | 0.31 | 22.66 | 0.013 |
| H6                        | 22.69 | 23.19 | 23.02    | 23.34 | 23.21 | 0.25 | 23.09 | 0.011 |
| H7                        | 21.37 | 22.01 | 38.08    | 22.45 | 22.42 | 7.18 | 25.27 | 0.284 |
| H8                        | 22.49 | 22.53 | Undetec. | 22.28 | 22.66 | 0.16 | 22.49 | 0.007 |
| H9                        | 22.84 | 23.19 | 23.39    | 34.53 | 24.45 | 4.98 | 25.68 | 0.194 |
| H10                       | 22.16 | 22.65 | 22.03    | 22.59 | 22.55 | 0.28 | 22.4  | 0.012 |
| H11                       | 22.69 | 23.2  | 22.3     | 22.94 | 23.22 | 0.38 | 22.87 | 0.017 |
| H12                       | 21.96 | 22.58 | 22.27    | 22.56 | 22.8  | 0.32 | 22.43 | 0.014 |
| <b>Average</b>            |       |       |          |       |       | 0.64 | 23.02 | 0.027 |
| <b>Standard deviation</b> |       |       |          |       |       | 1.04 | 1.34  | 0.04  |
