# Supplementary material for: A comprehensive collection of experimentally validated primers for Polymerase Chain Reaction quantitation of murine transcript abundance
Source: Springer Nature journal article supplement (doi:10.1186/1471-2164-9-633), 2008-12-01
Supplement: Additional file 17 [file 1471-2164-9-633-s17.pdf]

| <b>Group</b> | <b>Average efficiency</b> | <b>Standard deviation</b> | <b>Coefficient of variation</b> |
|--------------|---------------------------|---------------------------|---------------------------------|
| 33859690a1   | 93                        | 13                        | 0.143                           |
| 26339558a1   | 82                        | 14                        | 0.172                           |
| 16945964a1   | 116                       | 55                        | 0.479                           |
| 22128741a1   | 79                        | 1                         | 0.014                           |
| 25072201a1   | 131                       | 94                        | 0.714                           |
| 6679032a1    | 95                        | 16                        | 0.166                           |
| 13386096a1   | 94                        | 17                        | 0.183                           |
| 29789229a1   | 97                        | 16                        | 0.166                           |
| 22129565a1   | 94                        | 39                        | 0.416                           |
| 6754800a1    | 108                       | 65                        | 0.605                           |
| 31982602a1   | 99                        | 40                        | 0.404                           |
| 33238936a1   | 88                        | 11                        | 0.131                           |
| 29179426a1   | 89                        | 5                         | 0.054                           |
