# Supplementary figures and images for: A comprehensive collection of experimentally validated primers for Polymerase Chain Reaction quantitation of murine transcript abundance
Source: Springer Nature journal article supplement (doi:10.1186/1471-2164-9-633), 2008-12-01

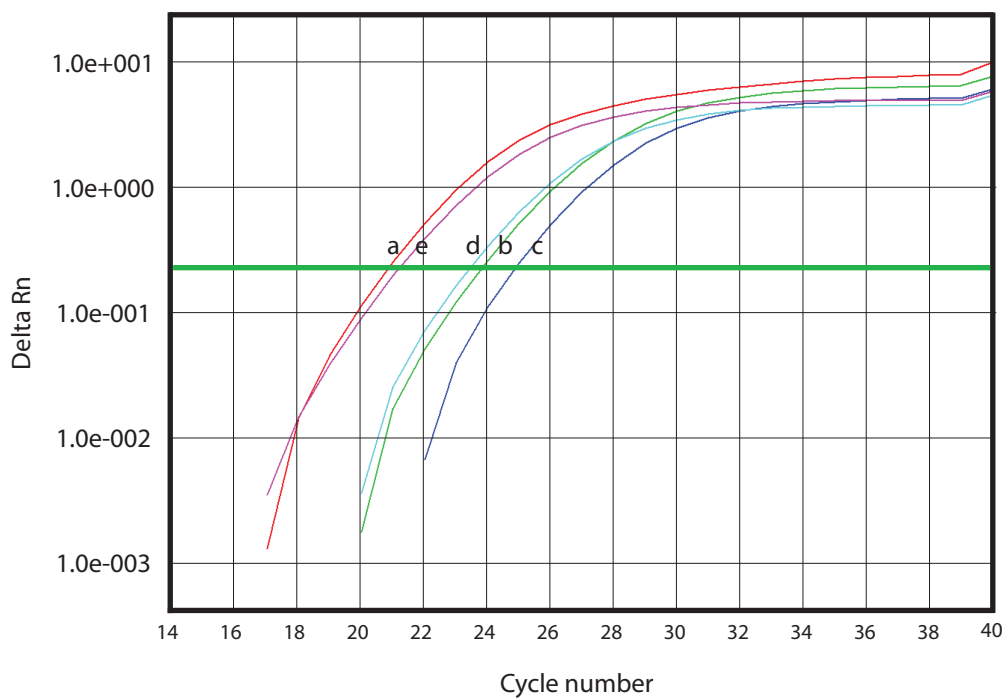

**A**

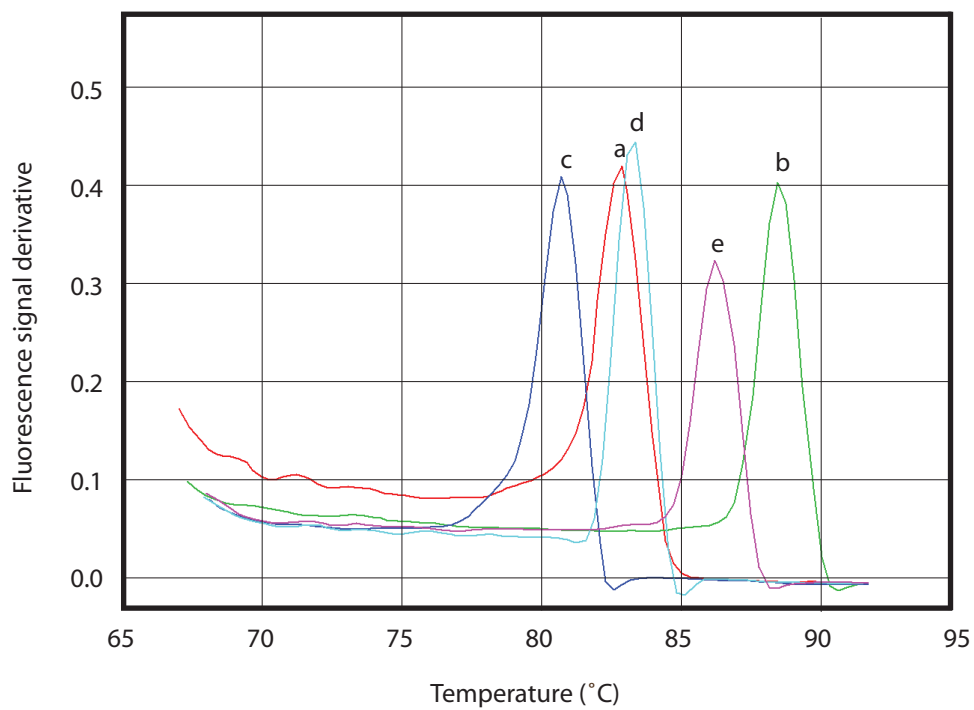

**B**

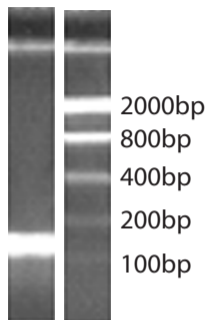

a.

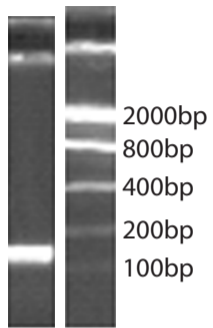

b.

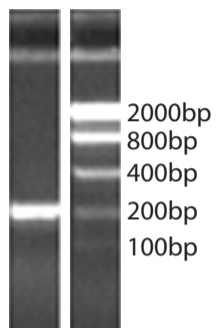

c.

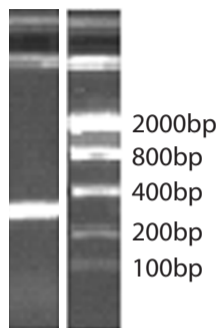

d.

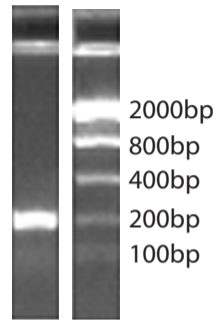

e.

c

Supplement: Additional file 1 [file 1471-2164-9-633-s1.pdf]
